# Supplementary figures and images for: Associations of Transcription Factor 21 Gene Polymorphisms with the Growth and Body Composition Traits in Broilers
Source: MDPI journal article supplement (doi:10.3390/ani12030393), 2022-02-08

Supplementary Materials:

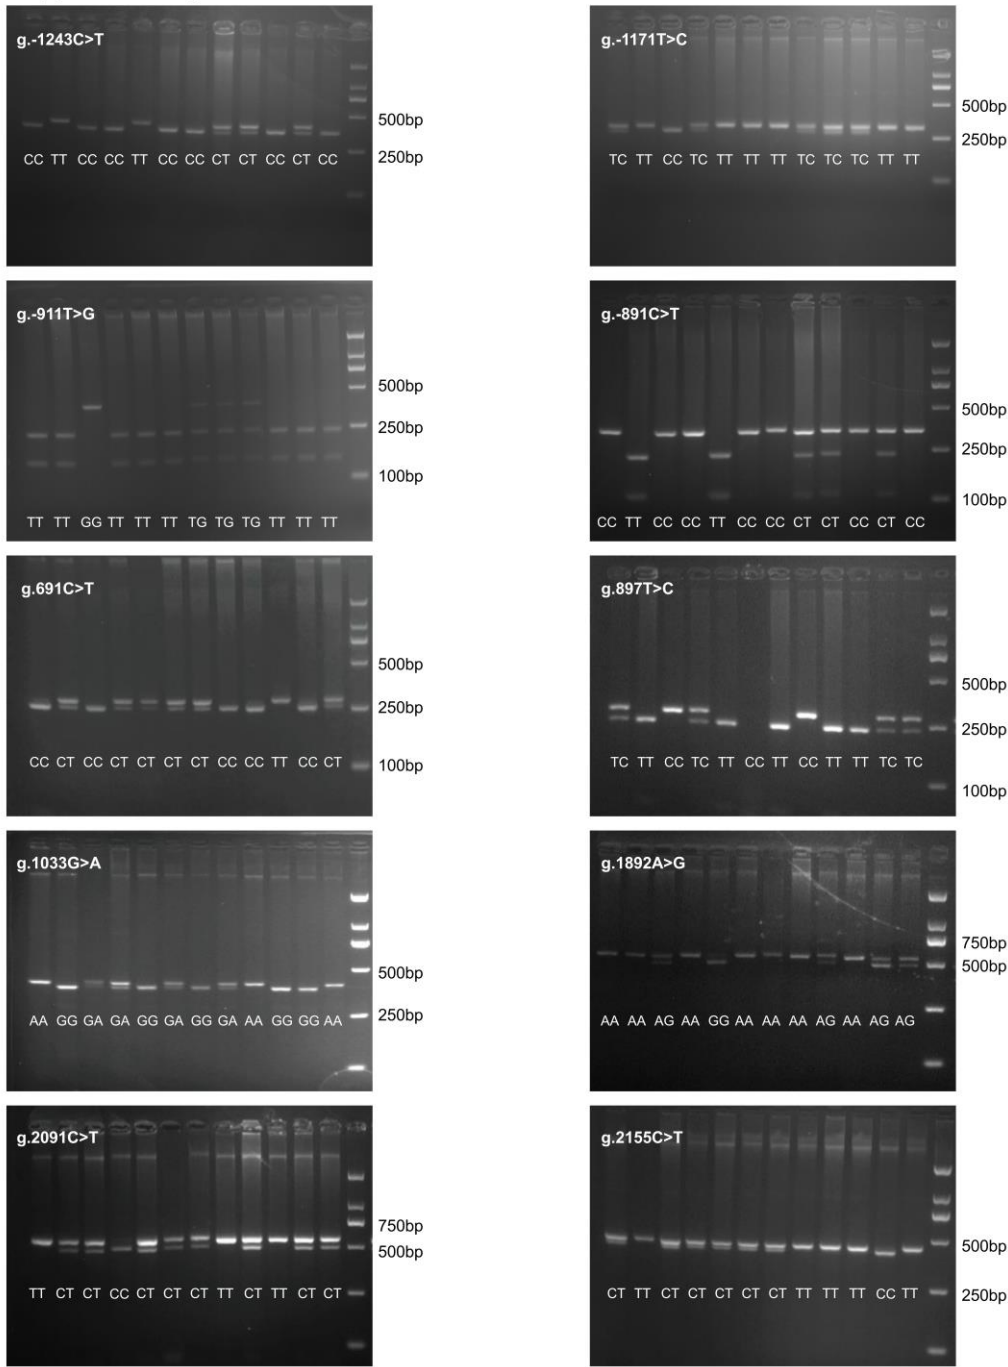

Figure S1: TCF21 gene SNPs typing results.

Supplement: s1 [file s1]
